# Supplementary material for: Biphasic P2/O3-Na2/3Li0.18Mn0.8Fe0.2O2: a structural investigation
Source: Royal Society of Chemistry journal article supplement (doi:10.1039/d0dt03351k), 2020-12-22
Supplement: d0dt03351k1.pdf [file d0dt03351k1.pdf]

## Supplementary data:

### Biphasic P2/O3-Na<sub>2/3</sub>Li<sub>0.18</sub>Mn<sub>0.8</sub>Fe<sub>0.2</sub>O<sub>2</sub>: A Structural Investigation.

Jennifer H. Stansby<sup>a,b</sup>, Maxim Avdeev<sup>b</sup>, Helen E. A. Brand<sup>c</sup>, Elena Gonzalo<sup>d</sup>, Nicholas E. Drewett<sup>d</sup>,  
Nagore Ortiz-Vitoriano<sup>d,e</sup>, Neeraj Sharma<sup>a,\*</sup>, and Teófilo Rojo<sup>e,f</sup>

<sup>a</sup> School of Chemistry, UNSW Australia, Sydney, NSW 2052, Australia

<sup>b</sup> Australian Centre for Neutron Scattering, Australia Nuclear Science and Technology  
Organisation, Kirrawee, DC NSW 2253, Australia.

<sup>c</sup> Australian Synchrotron, 800 Blackburn Road, Clayton, Victoria 3168, Australia

<sup>d</sup> Centre for Cooperative Research on Alternative Energies (CIC energiGUNE), Basque Research  
and Technology Alliance (BRTA), Alava Technology Park, Albert Einstein 48, 01510 Vitoria-  
Gasteiz, Spain

<sup>e</sup> Ikerbasque, Basque Foundation for Science, María Díaz de Haro 3, 48013 Bilbao, Spain

<sup>f</sup> Departamento de Química Inorgánica. Universidad del País Vasco UPV/EHU. P.O. Box 664,  
48080 Bilbao, Spain

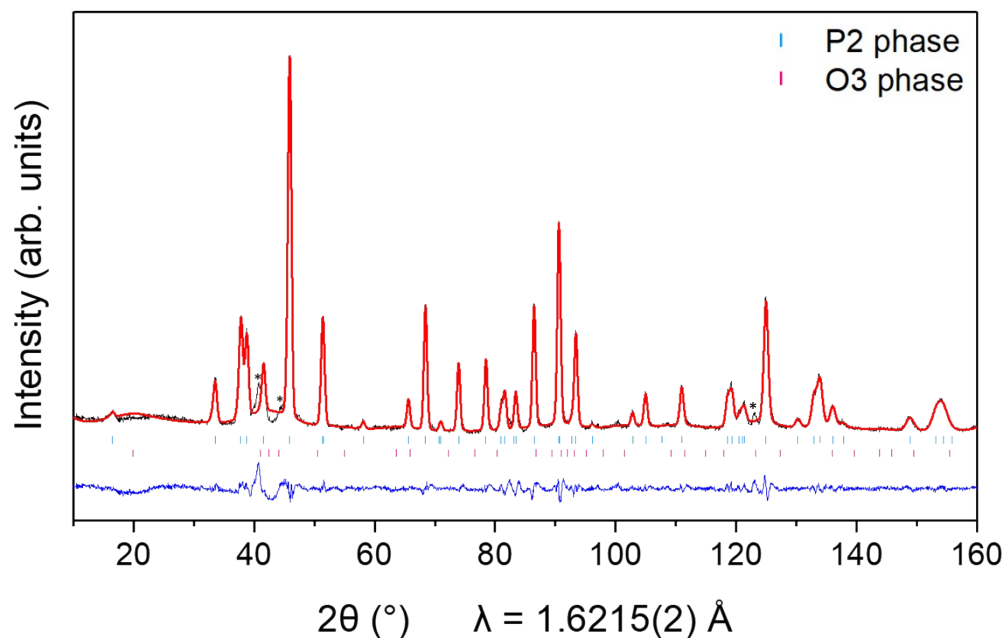

**Figure S1.** Neutron diffraction data collected at room temperature for the pristine P2/O3- $\text{Na}_{2/3}\text{Li}_{0.18}\text{Mn}_{0.8}\text{Fe}_{0.2}\text{O}_2$  powder, indexed with a P2 and O3 phase (Le Bail fit). Observed, calculated and difference are shown by a solid black, red and blue line, respectively. Asterisks indicate reflection intensity around  $2\theta = 40^\circ$ ,  $43^\circ$  and  $125^\circ$  which are not accounted for by the model. The peak around  $2\theta = 40^\circ$  is later accounted for upon introducing Li to Rietveld-refined model, while the origin of the peaks around  $2\theta = 43^\circ$  and  $125^\circ$  are unknown.

**Table S1.** Concentration (in ppm) of the experimental and theoretical molar ratio (fixing Mn content) of the elements detected in the sample by ICP-OES measurement.

| Element | ICP Concentration (ppm) | Experimental molar ratio* | Theoretical molar ratio |
|---------|-------------------------|---------------------------|-------------------------|
| Na      | 6.61                    | 0.62(1)                   | 0.67                    |
| Mn      | 20.4                    | 0.80                      | 0.8                     |
| Fe      | 4.82                    | 0.19(1)                   | 0.2                     |
| Li      | 0.574                   | 0.18(2)                   | 0.18                    |

\*Errors calculated based on a 10% variation in ICP concentrations. No error is given for Mn since the Mn content is fixed to perform the calculations.

**Table S2.** Crystallographic parameters for P2-Na<sub>2/3</sub>Mn<sub>0.8</sub>Fe<sub>0.2</sub>O<sub>2</sub> as determined from Rietveld analysis of neutron powder diffraction data (*P6<sub>3</sub>/mmc*), see also Figure 4.

| Atom            | Wyckoff | x   | y   | z         | SOF <sup>a</sup> | Isotropic ADP <sup>a</sup><br>(×100/Å <sup>2</sup> ) |
|-----------------|---------|-----|-----|-----------|------------------|------------------------------------------------------|
| Na <sub>e</sub> | 2b      | 0   | 0   | 0.25      | 0.30(1) *        | 7.2(3)                                               |
| Na <sub>f</sub> | 2d      | 1/3 | 2/3 | 0.75      | 0.37(1) *        | 6.8(3)                                               |
| Mn              | 2a      | 0   | 0   | 0         | 0.8              | 0.29(9)                                              |
| Fe              | 2a      | 0   | 0   | 0         | 0.2              | 0.27(9)                                              |
| O               | 4f      | 1/3 | 2/3 | 0.0909(1) | 1                | 1.3(1)                                               |

<sup>a</sup> Atomic displacement parameter (ADP), site occupancy factor (SOF). \* Total Na content constrained to be 0.67. Space group *P6<sub>3</sub>/mmc*, R<sub>p</sub> = 4.4%, wR<sub>p</sub> = 5.6%, a = 2.8816(1) Å, c = 11.2060(4) Å. Weight fraction = 93.83(2)%.

**Table S3.** Crystallographic parameters for O3-LiMn<sub>0.8</sub>Fe<sub>0.2</sub>O<sub>2</sub> as determined from Rietveld analysis of neutron powder diffraction data (*R-3m*), see also Figure 4.

| Atom | Wyckoff | x | y | z         | SOF <sup>a</sup> | Isotropic ADP <sup>a</sup><br>(×100/Å <sup>2</sup> ) |
|------|---------|---|---|-----------|------------------|------------------------------------------------------|
| Li   | 3a      | 0 | 0 | 0         | 1                | 5.2(11)                                              |
| Mn   | 3b      | 0 | 0 | 0.5       | 0.8              | 1.0*                                                 |
| Fe   | 3b      | 0 | 0 | 0.5       | 0.2              | 1.0*                                                 |
| O    | 6c      | 0 | 0 | 0.2358(5) | 1                | 0.42(9)                                              |

<sup>a</sup> Atomic displacement parameter (ADP), site occupancy factor (SOF). \* Values fixed. Space group *R-3m*, R<sub>p</sub> = 4.4%, wR<sub>p</sub> = 5.6%, a = 2.8419(6) Å, c = 14.198(6) Å. Weight fraction = 6.17(1)%.

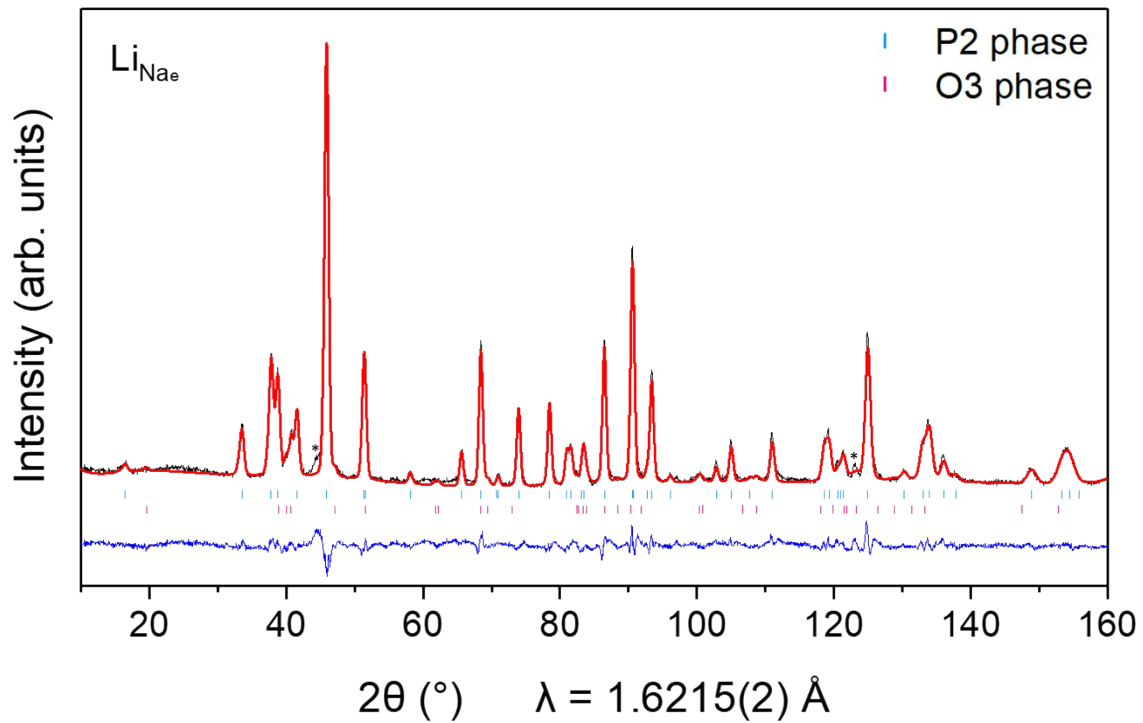

**Figure S2.** Rietveld analysis of neutron diffraction data collected at room temperature for the pristine P2/O3- $\text{Na}_{2/3}\text{Li}_{0.18}\text{Mn}_{0.8}\text{Fe}_{0.2}\text{O}_2$  powder, indexed with O3- $\text{LiMn}_{0.8}\text{Fe}_{0.2}\text{O}_2$  and P2- $\text{Na}_{2/3}\text{Li}_{0.12}\text{Mn}_{0.8}\text{Fe}_{0.2}\text{O}_2$  whereby Li is introduced onto the  $\text{Na}_e$  site. Observed, calculated and difference are shown by a solid black, red and blue line, respectively. The asterisks indicate small peaks around  $2\theta = 43^\circ$  and  $125^\circ$  which are not accounted for by the model; the origin of these reflections is unknown.

**Table S4.** Crystallographic parameters for P2-Na<sub>0.71</sub>Li<sub>0.12</sub>Mn<sub>0.8</sub>Fe<sub>0.2</sub>O<sub>2</sub> with Li on the Na<sub>e</sub> site (model 1) as determined from Rietveld analysis of neutron powder diffraction data (*P6<sub>3</sub>/mmc*).

| Atom            | Wyckoff | x   | y   | z         | SOF <sup>a</sup> | Isotropic<br>( $\times 100/\text{\AA}^2$ ) | ADP <sup>a</sup> |
|-----------------|---------|-----|-----|-----------|------------------|--------------------------------------------|------------------|
| Na <sub>e</sub> | 2b      | 0   | 0   | 0.25      | 0.32(1) *        | 4.6(2)                                     |                  |
| Na <sub>f</sub> | 2d      | 1/3 | 2/3 | 0.75      | 0.39(1) *        | 7.4(3)                                     |                  |
| Li              | 2b      | 0   | 0   | 0.25      | 0.12             | 3.5(7)                                     |                  |
| Mn              | 2a      | 0   | 0   | 0         | 0.8              | 0.71(4)                                    |                  |
| Fe              | 2a      | 0   | 0   | 0         | 0.2              | 0.78(6)                                    |                  |
| O               | 4f      | 1/3 | 2/3 | 0.0907(1) | 1                | 1.4(1)                                     |                  |

<sup>a</sup> Atomic displacement parameter (ADP), site occupancy factor (SOF). \* Total Na content constrained to be 0.71. Space group *P6<sub>3</sub>/mmc*,  $R_p = 4.4\%$ ,  $wR_p = 5.5\%$ ,  $a = 2.8816(1) \text{ \AA}$ ,  $c = 11.2057(4) \text{ \AA}$ .

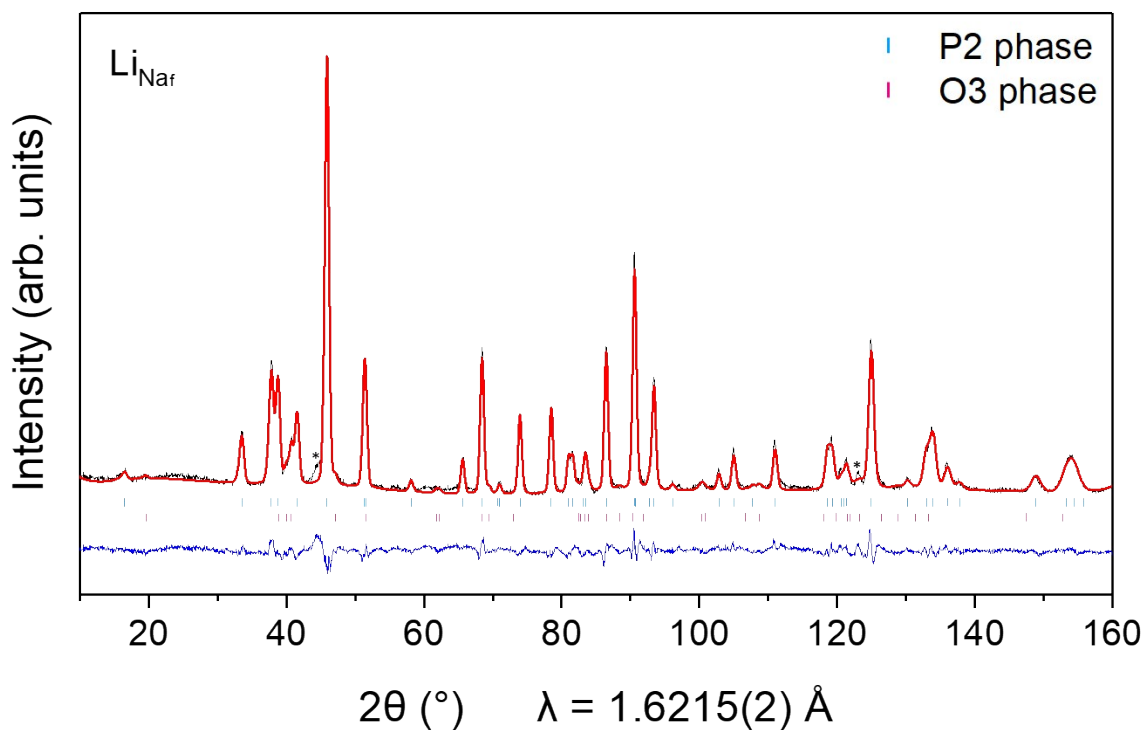

**Figure S3.** Rietveld analysis of neutron diffraction data collected at room temperature for the pristine P2/O3- $\text{Na}_{2/3}\text{Li}_{0.18}\text{Mn}_{0.8}\text{Fe}_{0.2}\text{O}_2$  powder, indexed with O3- $\text{LiMn}_{0.8}\text{Fe}_{0.2}\text{O}_2$  and P2- $\text{Na}_{2/3}\text{Li}_{0.12}\text{Mn}_{0.8}\text{Fe}_{0.2}\text{O}_2$  whereby Li is introduced onto the  $\text{Na}_f$  site. Observed, calculated and difference are shown by a solid black, red and blue line, respectively. The asterisks indicate small peaks around  $2\theta = 43^\circ$  and  $125^\circ$  which are not accounted for by the model; the origin of these reflections is unknown.

**Table S5.** Crystallographic parameters for P2-Na<sub>0.71</sub>Li<sub>0.12</sub>Mn<sub>0.8</sub>Fe<sub>0.2</sub>O<sub>2</sub> with Li on the Na<sub>f</sub> site (model 2) as determined from Rietveld analysis of neutron powder diffraction data (*P6<sub>3</sub>/mmc*).

| Atom            | Wyckoff | x   | y   | z         | SOF <sup>a</sup> | Isotropic<br>(×100/Å <sup>2</sup> ) | ADP <sup>a</sup> |
|-----------------|---------|-----|-----|-----------|------------------|-------------------------------------|------------------|
| Na <sub>e</sub> | 2b      | 0   | 0   | 0.25      | 0.32(1) *        | 7.7(3)                              |                  |
| Na <sub>f</sub> | 2d      | 1/3 | 2/3 | 0.75      | 0.39(1) *        | 5.8(2)                              |                  |
| Li <sub>f</sub> | 2d      | 1/3 | 2/3 | 0.75      | 0.12             | 2.5(9)                              |                  |
| Mn              | 2a      | 0   | 0   | 0         | 0.8              | 0.26(3)                             |                  |
| Fe              | 2a      | 0   | 0   | 0         | 0.2              | 0.17(5)                             |                  |
| O               | 4f      | 1/3 | 2/3 | 0.0908(1) | 1                | 1.4(1)                              |                  |

<sup>a</sup> Atomic displacement parameter (ADP), site occupancy factor (SOF). \* Total Na content constrained to be 0.71. Space group *P6<sub>3</sub>/mmc*,  $R_p = 4.4\%$ ,  $wR_p = 5.5\%$ ,  $a = 2.8816(1) \text{ \AA}$ ,  $c = 11.2057(4) \text{ \AA}$ .



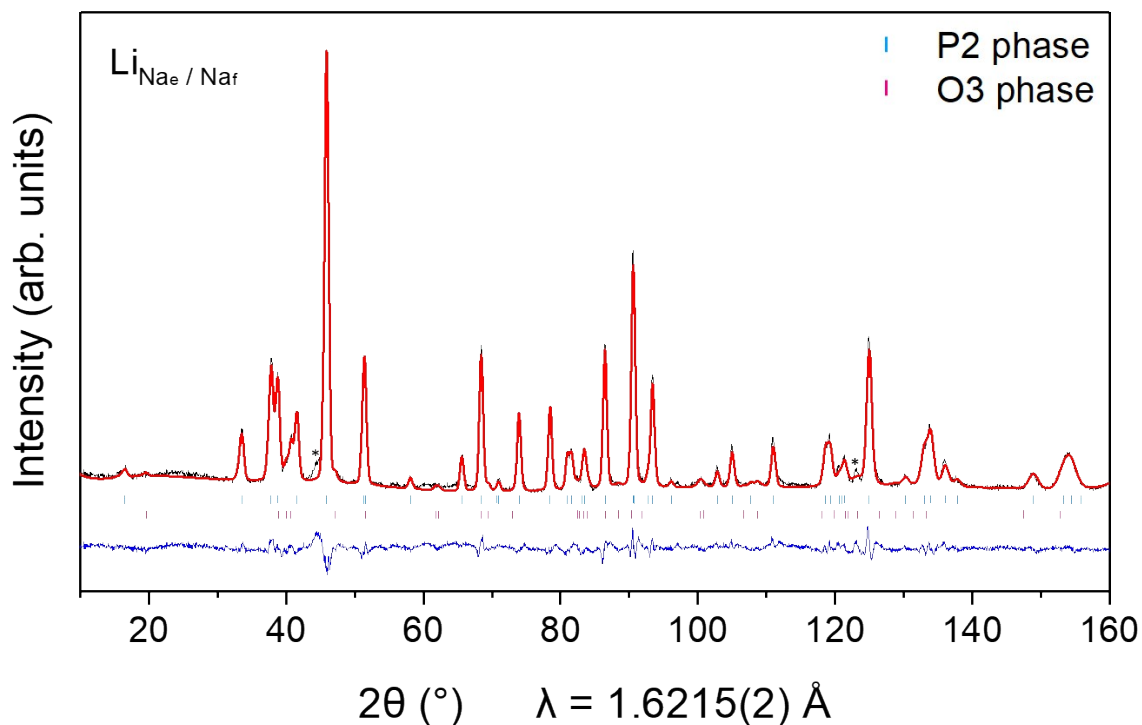

**Figure S4.** Rietveld analysis of neutron diffraction data collected at room temperature for the pristine P2/O3- $\text{Na}_{2/3}\text{Li}_{0.18}\text{Mn}_{0.8}\text{Fe}_{0.2}\text{O}_2$  powder, indexed with O3- $\text{LiMn}_{0.8}\text{Fe}_{0.2}\text{O}_2$  and P2- $\text{Na}_{2/3}\text{Li}_{0.12}\text{Mn}_{0.8}\text{Fe}_{0.2}\text{O}_2$  whereby Li is introduced onto both the  $\text{Na}_e$  and  $\text{Na}_f$  site. Observed, calculated and difference are shown by a solid black, red and blue line, respectively. The asterisks indicate small peaks around  $2\theta = 43^\circ$  and  $125^\circ$  which are not accounted for by the model; the origin of these reflections is unknown.

**Table S6.** Crystallographic parameters for P2-Na<sub>0.71</sub>Li<sub>0.12</sub>Mn<sub>0.8</sub>Fe<sub>0.2</sub>O<sub>2</sub> with Li on both the Na<sub>e</sub> and Na<sub>f</sub> site (model 3) as determined from Rietveld analysis of neutron powder diffraction data (P6<sub>3</sub>/mmc).

| Atom            | Wyckoff | x   | y   | z         | SOF <sup>a</sup> | Isotropic<br>(×100/Å <sup>2</sup> ) | ADP <sup>a</sup> |
|-----------------|---------|-----|-----|-----------|------------------|-------------------------------------|------------------|
| Na <sub>e</sub> | 2b      | 0   | 0   | 0.25      | 0.32(1) *        | 6.3(2)                              |                  |
| Na <sub>f</sub> | 2d      | 1/3 | 2/3 | 0.75      | 0.39(1) *        | 6.5(2)                              |                  |
| Li <sub>e</sub> | 2b      | 0   | 0   | 0.25      | 0.06             | 5.3(2)                              |                  |
| Li <sub>f</sub> | 2d      | 1/3 | 2/3 | 0.75      | 0.06             | 3.2(2)                              |                  |
| Mn              | 2a      | 0   | 0   | 0         | 0.8              | 0.48(3)                             |                  |
| Fe              | 2a      | 0   | 0   | 0         | 0.2              | 0.47(5)                             |                  |
| O               | 4f      | 1/3 | 2/3 | 0.0908(1) | 1                | 1.4(1)                              |                  |

<sup>a</sup> Atomic displacement parameter (ADP), site occupancy factor (SOF). \* Total Na content constrained to be 0.71. Space group P6<sub>3</sub>/mmc, R<sub>p</sub> = 4.4%, wR<sub>p</sub> = 5.5%, a = 2.8816(1) Å, c = 11.2057(4) Å.

**Calculation for the distribution of alkali ions in the P2 phase:**

*Overall composition:* P2/O3-Na<sub>2/3</sub>Li<sub>0.18</sub>Mn<sub>0.8</sub>Fe<sub>0.2</sub>O<sub>2</sub>

*Composition of O3 phase:* LiMn<sub>0.8</sub>Fe<sub>0.2</sub>O<sub>2</sub>

*Relative phase fractions:* P2 = 93.83 %; O3 = 6.17 %

*Remaining Li that must occupy the P2 phase:* 0.18 – 1\*6.17%/100 = 0.12

*Na present in P2 phase:* 0.67/0.9383 = 0.71
